# Supplementary material for: A Unified Framework for Stock Price Prediction: Integrating NLP-Based Sentiment, Dimensionality Reduction and Regularization
Source: Research Square preprint supplement (doi:10.21203/rs.3.rs-8194360/v1), 2025-12-03
Supplement: Supplementary file 1 [file 180f4966f187662ca93f4fda.xlsx]

## Sheet: N126
	Normal Scenario		n=126
	Model	Variable Selection Methods	None	NLP1	NLP2	NLP3	NLP4	NLP1, NLP2	NLP1, NLP3	NLP1, NLP4	NLP2, NLP3	NLP2, NLP4	NLP3, NLP4	NLP1, NLP2, NLP3	NLP1, NLP2, NLP4	NLP1, NLP3, NLP4	NLP2, NLP3, NLP4	NLP1, NLP2, NLP3, NLP4
	ANN	ElasticNet	0.743691	0.682584	0.757833	0.756236	0.727289	0.687629	0.692292	0.704167	0.791385	0.755153	0.794639	0.716253	0.718572	0.720686	0.818553	0.759382
		LASSO	0.792078	0.729005	0.803427	0.82891	0.840092	0.707813	0.766526	0.741426	0.841807	0.825636	0.854401	0.745148	0.740532	0.785129	0.832806	0.740271
		No Selection	0.807679	0.710508	0.811554	0.798309	0.804967	0.793116	0.764506	0.741348	0.839761	0.852049	0.852097	0.737207	0.753771	0.791536	0.901554	0.783383
		PCA	0.885853	0.802475	0.895697	0.913404	0.945111	0.792482	0.835965	0.795342	0.957349	0.912063	0.885345	0.829557	0.79342	0.802349	0.894961	0.84742
		PCA+ElasticNet	0.890088	0.814212	0.921481	0.889319	0.931866	0.817232	0.833651	0.771351	0.907158	0.878564	0.926417	0.782141	0.796516	0.861704	0.928064	0.835282
		PCA+LASSO	0.935599	0.828358	0.911771	0.951664	0.908578	0.788602	0.806329	0.842779	0.937888	0.887538	0.9111	0.822118	0.816311	0.844852	0.947297	0.828762
	ARIMAX	ElasticNet	0.543506	0.892976	0.540987	0.620747	0.596367	0.847869	0.828878	0.806491	0.533768	0.537252	0.537744	0.606052	0.500743	0.560679	0.54008	0.554485
		LASSO	0.568267	0.730025	0.509892	0.753745	0.519191	0.477671	0.58798	0.813478	0.507571	0.508275	0.531368	0.764054	0.910737	0.553097	0.506645	0.465873
		No Selection	0.561142	0.905061	0.501021	0.669064	0.510152	0.487872	0.576326	0.814952	0.498254	0.498408	0.521963	0.768222	0.942943	0.542736	0.499097	0.456185
		PCA	0.621496	0.543181	0.612066	0.612025	0.619267	0.537993	0.535944	0.538766	0.615852	0.625568	0.622746	0.540332	0.54235	0.540275	0.626225	0.545315
		PCA+ElasticNet	0.556004	0.492733	0.552715	0.555092	0.554846	0.50713	0.502033	0.507337	0.54446	0.553444	0.55453	0.505566	0.505629	0.508348	0.547775	0.507115
		PCA+LASSO	0.558376	0.500397	0.568733	0.568618	0.570963	0.516789	0.515567	0.5125	0.56614	0.577869	0.57188	0.525438	0.511992	0.521421	0.562925	0.525215
	GRU	ElasticNet	0.673046	0.653645	0.648023	0.681929	0.676137	0.590417	0.640873	0.657527	0.641117	0.627219	0.690504	0.613174	0.595022	0.618073	0.633491	0.59387
		LASSO	0.935133	0.906434	0.919918	0.943944	0.914275	0.91785	0.918626	0.919711	0.915036	0.937743	0.944569	0.913719	0.926221	0.926636	0.928034	0.917417
		No Selection	0.982761	0.974273	0.978294	0.987105	0.973773	0.973751	0.978431	0.985517	0.973935	0.985194	0.981287	0.982899	0.986788	0.977913	0.984175	0.987321
		PCA	0.588145	0.536269	0.548725	0.5902	0.592352	0.49171	0.523589	0.534039	0.569545	0.555662	0.591878	0.488117	0.470082	0.531604	0.554283	0.488734
		PCA+ElasticNet	0.531219	0.475891	0.472189	0.527336	0.5215	0.422462	0.463232	0.479866	0.490975	0.488579	0.516194	0.430339	0.439718	0.485958	0.467321	0.434815
		PCA+LASSO	0.529269	0.465056	0.470655	0.5303	0.512271	0.429732	0.480408	0.479743	0.490459	0.4753	0.535789	0.425521	0.423938	0.487375	0.474163	0.436344
	LSTM	ElasticNet	0.69669	0.637591	0.657339	0.707985	0.699018	0.594359	0.643754	0.64942	0.647485	0.633565	0.677583	0.601668	0.563377	0.636738	0.650453	0.58056
		LASSO	0.933932	0.9235	0.92538	0.932595	0.926082	0.914813	0.917234	0.92493	0.919812	0.917326	0.922371	0.916548	0.915584	0.921618	0.924357	0.903063
		No Selection	0.977322	0.977088	0.97744	0.984906	0.976824	0.977548	0.982927	0.979871	0.981774	0.978605	0.982294	0.979489	0.98732	0.979409	0.981997	0.983154
		PCA	0.586525	0.521825	0.55224	0.613414	0.604987	0.476344	0.514959	0.513004	0.537498	0.559278	0.595787	0.456709	0.459257	0.523949	0.554872	0.486078
		PCA+ElasticNet	0.513376	0.468981	0.462193	0.522925	0.532499	0.412327	0.482093	0.484651	0.465981	0.482496	0.497965	0.410918	0.413124	0.484957	0.464766	0.404834
		PCA+LASSO	0.509412	0.467959	0.49143	0.525222	0.524762	0.402379	0.478151	0.466241	0.479857	0.468901	0.529438	0.408078	0.413513	0.463879	0.463368	0.404665

## Sheet: N504
	Normal Scenario		n=504
	Model	Variable Selection Methods	None	NLP1	NLP2	NLP3	NLP4	NLP1, NLP2	NLP1, NLP3	NLP1, NLP4	NLP2, NLP3	NLP2, NLP4	NLP3, NLP4	NLP1, NLP2, NLP3	NLP1, NLP2, NLP4	NLP1, NLP3, NLP4	NLP2, NLP3, NLP4	NLP1, NLP2, NLP3, NLP4
	ANN	ElasticNet	0.595872	0.578108	0.578057	0.622269	0.613269	0.528098	0.579247	0.59094	0.598314	0.61315	0.642945	0.549451	0.551189	0.594589	0.627201	0.569717
		LASSO	0.637771	0.585537	0.596869	0.65768	0.6505	0.571718	0.626821	0.607091	0.641466	0.632262	0.675073	0.598422	0.583651	0.634491	0.646099	0.581683
		No Selection	0.636289	0.593302	0.610172	0.665279	0.622969	0.580532	0.610297	0.590325	0.640367	0.642351	0.688371	0.597789	0.574956	0.647698	0.658461	0.604408
		PCA	0.641417	0.598624	0.62318	0.656161	0.651353	0.589736	0.584499	0.624892	0.649464	0.640741	0.693673	0.565554	0.568963	0.623961	0.66477	0.600341
		PCA+ElasticNet	0.568552	0.551647	0.540067	0.580957	0.587103	0.503437	0.584077	0.571207	0.530951	0.578042	0.59635	0.516502	0.573978	0.591643	0.55885	0.544676
		PCA+LASSO	0.560254	0.557332	0.544235	0.584584	0.573718	0.517878	0.577505	0.58462	0.572099	0.553572	0.596795	0.544669	0.565567	0.576355	0.641835	0.570086
	ARIMAX	ElasticNet	0.511958	0.466264	0.509837	0.509839	0.510983	0.452618	0.452038	0.456909	0.50478	0.504931	0.505074	0.449126	0.447115	0.450945	0.501235	0.438104
		LASSO	0.427732	0.397388	0.429302	0.428806	0.429209	0.399488	0.398953	0.399456	0.430064	0.430334	0.430084	0.398888	0.399463	0.399688	0.430044	0.398933
		No Selection	0.418245	0.389538	0.419887	0.419503	0.419704	0.391147	0.390968	0.391167	0.420268	0.420384	0.420707	0.391864	0.39204	0.392436	0.421056	0.393089
		PCA	0.540806	0.477045	0.541882	0.542247	0.542471	0.477944	0.478254	0.478469	0.542708	0.542711	0.542919	0.479109	0.478301	0.479166	0.543279	0.479372
		PCA+ElasticNet	0.487955	0.436515	0.493119	0.494267	0.494437	0.455094	0.456708	0.456133	0.494643	0.496416	0.495531	0.455257	0.457232	0.456937	0.496317	0.456204
		PCA+LASSO	0.488488	0.43963	0.505812	0.499428	0.499444	0.461478	0.462043	0.459894	0.508428	0.50833	0.500511	0.462179	0.463257	0.462349	0.509074	0.46234
	GRU	ElasticNet	0.425892	0.384901	0.330302	0.419893	0.423934	0.279979	0.383671	0.387226	0.327665	0.324368	0.420254	0.277951	0.271833	0.38913	0.327616	0.277038
		LASSO	0.848506	0.837575	0.834161	0.847457	0.849332	0.828249	0.830739	0.837832	0.840816	0.838957	0.855055	0.824837	0.826557	0.835419	0.849985	0.821149
		No Selection	0.946922	0.944485	0.943756	0.948156	0.945566	0.944321	0.946005	0.944144	0.944176	0.944024	0.946999	0.944333	0.949916	0.94612	0.945886	0.946316
		PCA	0.49517	0.43363	0.393245	0.49517	0.495623	0.306235	0.43919	0.432544	0.38823	0.396496	0.500754	0.312256	0.307987	0.435661	0.390411	0.310856
		PCA+ElasticNet	0.427465	0.395819	0.326516	0.43127	0.429579	0.261657	0.396422	0.395528	0.33374	0.330544	0.430002	0.26303	0.265326	0.396902	0.324524	0.266297
		PCA+LASSO	0.420317	0.380527	0.325759	0.419539	0.426775	0.273016	0.385803	0.384794	0.330457	0.331764	0.421733	0.272419	0.268727	0.385943	0.329109	0.273692
	LSTM	ElasticNet	0.416415	0.387172	0.325801	0.417763	0.413192	0.265005	0.380802	0.384095	0.323868	0.321385	0.418899	0.266499	0.265262	0.388036	0.338752	0.277957
		LASSO	0.852004	0.835949	0.840756	0.849764	0.85192	0.825722	0.839372	0.83476	0.840457	0.8396	0.846492	0.819647	0.826287	0.837505	0.839238	0.825827
		No Selection	0.944791	0.953261	0.945028	0.945111	0.944265	0.944463	0.944899	0.946586	0.944072	0.94544	0.943428	0.946071	0.944613	0.944286	0.94429	0.946384
		PCA	0.490753	0.434091	0.3874	0.49394	0.500936	0.294813	0.429567	0.43361	0.389325	0.389863	0.49609	0.295235	0.303533	0.438785	0.388261	0.307791
		PCA+ElasticNet	0.42591	0.392066	0.317169	0.42749	0.43175	0.257715	0.39393	0.389396	0.318707	0.319986	0.431265	0.262959	0.259059	0.40096	0.326903	0.26379
		PCA+LASSO	0.415891	0.379295	0.323371	0.420129	0.416908	0.263969	0.381106	0.378956	0.322315	0.324951	0.420652	0.26329	0.261456	0.386168	0.323714	0.257119

## Sheet: N1008
	Normal Scenario		n=1008
	Model	Variable Selection Methods	None	NLP1	NLP2	NLP3	NLP4	NLP1, NLP2	NLP1, NLP3	NLP1, NLP4	NLP2, NLP3	NLP2, NLP4	NLP3, NLP4	NLP1, NLP2, NLP3	NLP1, NLP2, NLP4	NLP1, NLP3, NLP4	NLP2, NLP3, NLP4	NLP1, NLP2, NLP3, NLP4
	ANN	ElasticNet	0.508682	0.541234	0.444431	0.551011	0.541856	0.474245	0.522962	0.554461	0.498922	0.484432	0.542694	0.508607	0.491092	0.550406	0.503833	0.487835
		LASSO	0.558249	0.563087	0.487385	0.556713	0.533117	0.484014	0.556832	0.564147	0.528153	0.523252	0.570357	0.488834	0.52073	0.555531	0.524214	0.503089
		No Selection	0.546919	0.542801	0.507644	0.563941	0.571851	0.502147	0.543522	0.565194	0.532669	0.537037	0.580386	0.531848	0.499257	0.55631	0.543049	0.508714
		PCA	0.572048	0.537181	0.544736	0.584929	0.576675	0.482621	0.555302	0.540891	0.543311	0.552361	0.604915	0.498896	0.495658	0.546227	0.560525	0.514267
		PCA+ElasticNet	0.473841	0.499828	0.428	0.486379	0.476237	0.432909	0.502494	0.494243	0.431195	0.451519	0.49369	0.431746	0.414294	0.490559	0.466879	0.453132
		PCA+LASSO	0.473317	0.48624	0.429474	0.497255	0.475774	0.41952	0.492427	0.491705	0.427906	0.460553	0.499563	0.450896	0.419912	0.505902	0.475121	0.449104
	ARIMAX	ElasticNet	0.438787	0.393125	0.439974	0.442001	0.438869	0.383642	0.387543	0.390738	0.435834	0.437093	0.433661	0.378994	0.382104	0.382347	0.434164	0.374938
		LASSO	0.369719	0.348352	0.370451	0.370312	0.370845	0.348436	0.34786	0.349356	0.371195	0.370928	0.371078	0.348489	0.348459	0.34822	0.371854	0.348868
		No Selection	0.366363	0.344208	0.367409	0.367338	0.36755	0.345579	0.345191	0.345522	0.367676	0.367771	0.36797	0.345856	0.345901	0.345938	0.368087	0.346265
		PCA	0.495121	0.444568	0.495599	0.495309	0.495492	0.445136	0.444555	0.444965	0.4959	0.495868	0.495495	0.445527	0.445432	0.445187	0.496249	0.445834
		PCA+ElasticNet	0.417192	0.374047	0.4306	0.42922	0.42928	0.392346	0.393899	0.394208	0.433185	0.431431	0.429706	0.39272	0.394435	0.394926	0.431445	0.3935
		PCA+LASSO	0.41549	0.374746	0.4318	0.429156	0.429995	0.39355	0.395982	0.395534	0.432174	0.432108	0.430932	0.395009	0.396266	0.396915	0.431624	0.395459
	GRU	ElasticNet	0.355668	0.324648	0.279282	0.358862	0.357762	0.230478	0.327388	0.327923	0.28059	0.284102	0.360752	0.227434	0.223062	0.327533	0.279689	0.228547
		LASSO	0.736069	0.730919	0.723398	0.742402	0.740556	0.714875	0.728878	0.732809	0.731037	0.741703	0.73736	0.712758	0.719759	0.733168	0.725984	0.714483
		No Selection	0.866682	0.869067	0.869575	0.866204	0.868487	0.867831	0.867203	0.869757	0.867495	0.868089	0.867498	0.869111	0.868724	0.86783	0.867373	0.868166
		PCA	0.445096	0.381664	0.349838	0.443265	0.445409	0.252789	0.385709	0.386094	0.350841	0.345432	0.44513	0.25983	0.257464	0.38796	0.351566	0.259767
		PCA+ElasticNet	0.372705	0.339809	0.278165	0.371535	0.373433	0.223811	0.3423	0.341722	0.273363	0.277517	0.376041	0.223154	0.221387	0.343468	0.275284	0.22811
		PCA+LASSO	0.357795	0.326021	0.276831	0.361163	0.361487	0.220605	0.32798	0.328095	0.272867	0.275138	0.361314	0.224056	0.225408	0.326027	0.275565	0.225141
	LSTM	ElasticNet	0.3567	0.32525	0.278663	0.356687	0.356741	0.219624	0.32353	0.325436	0.279576	0.275666	0.358493	0.219351	0.220343	0.326075	0.276918	0.22154
		LASSO	0.74012	0.731377	0.731445	0.739208	0.740371	0.719112	0.7282	0.724649	0.73391	0.73036	0.744899	0.725924	0.719622	0.738503	0.733949	0.722695
		No Selection	0.866338	0.865876	0.866773	0.867002	0.865845	0.866575	0.865358	0.86435	0.866415	0.866874	0.865944	0.8668	0.865027	0.864913	0.866472	0.866732
		PCA	0.441725	0.381658	0.344885	0.443175	0.443574	0.253273	0.383828	0.379076	0.343953	0.344127	0.445601	0.255778	0.253098	0.381799	0.34974	0.255967
		PCA+ElasticNet	0.370812	0.338573	0.273854	0.37464	0.37352	0.219851	0.338345	0.338442	0.27397	0.271454	0.372037	0.218998	0.220026	0.340502	0.273157	0.224832
		PCA+LASSO	0.357415	0.323907	0.272891	0.357726	0.358799	0.216266	0.323053	0.324378	0.2755	0.271166	0.359411	0.221267	0.218806	0.324477	0.277092	0.220411

## Sheet: C126
	Crisis Scenario		n=126
	Model	Variable Selection Methods	None	NLP1	NLP2	NLP3	NLP4	NLP1, NLP2	NLP1, NLP3	NLP1, NLP4	NLP2, NLP3	NLP2, NLP4	NLP3, NLP4	NLP1, NLP2, NLP3	NLP1, NLP2, NLP4	NLP1, NLP3, NLP4	NLP2, NLP3, NLP4	NLP1, NLP2, NLP3, NLP4
	ANN	ElasticNet	1.31093	1.14493	1.26187	1.32516	1.32815	1.10385	1.18791	1.21388	1.23866	1.3194	1.36972	1.12467	1.17558	1.21819	1.32374	1.24552
		LASSO	1.38662	1.22535	1.29611	1.35593	1.34102	1.21429	1.27775	1.30127	1.34127	1.3449	1.37893	1.25496	1.21459	1.33567	1.36453	1.2168
		No Selection	1.57729	1.6558	1.69039	1.66099	1.69143	1.20677	1.31712	1.25941	1.3393	1.3697	1.40399	1.28456	1.30045	1.35643	1.35663	1.326
		PCA	1.70712	1.55752	1.72526	1.91431	1.75786	1.28357	1.35997	1.36718	1.43073	1.46858	1.48772	1.30872	1.44299	1.41018	1.43182	1.30797
		PCA+ElasticNet	1.32124	1.17393	1.25321	1.3189	1.33887	1.19255	1.17558	1.21679	1.32503	1.28949	1.32921	1.18302	1.28735	1.29094	1.36948	1.21545
		PCA+LASSO	1.36761	1.23344	1.23656	1.22963	1.38758	1.19863	1.29067	1.25587	1.23105	1.33678	1.27622	1.21267	1.10673	1.20251	1.2981	1.20088
	ARIMAX	ElasticNet	0.771306	0.773377	0.782697	0.78412	0.774905	0.776661	0.771855	0.779332	0.783303	0.786159	0.782196	0.78038	0.777338	0.776843	0.779777	0.779029
		LASSO	0.782943	0.786186	0.784459	0.780367	0.78123	0.779933	0.776743	0.786496	0.79126	0.792584	0.78494	0.788009	0.789475	0.787294	0.790948	0.790407
		No Selection	0.788843	0.783266	0.791048	0.787671	0.789095	0.787235	0.781626	0.785728	0.79281	0.794209	0.790842	0.788614	0.791207	0.786219	0.796299	0.792365
		PCA	4.70739	4.302	4.6136	4.61675	4.6295	4.28243	4.29627	4.30329	4.62039	4.68128	4.6479	4.33324	4.33102	4.31939	4.66251	4.43542
		PCA+ElasticNet	0.795162	0.793443	0.830589	0.807138	0.824054	0.826896	0.804416	0.818454	0.797304	0.806888	0.787164	0.794527	0.802694	0.782849	0.788615	0.782845
		PCA+LASSO	0.794296	0.792781	0.830085	0.807217	0.823865	0.826168	0.804695	0.818298	0.797707	0.805941	0.786845	0.795941	0.802638	0.782422	0.787877	0.782837
	GRU	ElasticNet	4.6041	4.49767	4.62081	4.45489	5.20705	4.69372	5.06043	4.92637	4.77101	4.65021	5.63919	4.62163	4.70413	5.30993	5.40185	4.92728
		LASSO	7.14263	5.69386	7.04409	6.39285	5.79241	4.79595	6.38435	6.40497	6.4607	6.83844	7.25937	5.98106	5.71893	6.16019	6.35336	7.11946
		No Selection	9.50751	8.78657	7.08796	5.87138	5.98243	7.10579	5.31763	6.368	5.39933	4.78796	6.54751	6.16088	5.99228	6.23028	7.31532	6.65454
		PCA	5.57163	4.93267	4.92847	4.92883	5.00569	4.61008	4.70048	4.81174	4.8179	5.08477	4.93909	4.46432	4.4618	4.69672	5.09751	4.64882
		PCA+ElasticNet	5.07006	4.35537	4.66811	4.61739	4.46864	4.19847	4.44782	4.52808	4.5478	4.48807	4.59461	4.02756	4.08453	4.81457	4.47567	4.5173
		PCA+LASSO	5.18758	4.50193	4.38087	4.89209	4.83822	4.05694	4.51108	4.33806	4.57504	4.66061	4.62612	4.32308	4.25597	4.4773	4.56719	4.39874
	LSTM	ElasticNet	1.52448	1.45966	1.45447	1.52221	1.52053	1.35994	1.43635	1.40231	1.45353	1.45177	1.53265	1.37654	1.38538	1.41835	1.45898	1.33529
		LASSO	1.6278	1.55812	1.60064	1.63868	1.62055	1.51137	1.53689	1.59653	1.589	1.60275	1.68777	1.48686	1.51552	1.5441	1.57756	1.54184
		No Selection	1.63213	1.5702	1.59565	1.64492	1.62807	1.50602	1.60614	1.53693	1.64584	1.62576	1.68944	1.53131	1.54092	1.56116	1.60222	1.50913
		PCA	1.52558	1.38846	1.42736	1.48911	1.54685	1.33003	1.37266	1.37478	1.42274	1.47226	1.52237	1.32519	1.30616	1.42848	1.46852	1.34307
		PCA+ElasticNet	1.44948	1.31994	1.31253	1.4011	1.41574	1.21921	1.27313	1.32186	1.37554	1.35458	1.43807	1.19436	1.20476	1.289	1.36351	1.13528
		PCA+LASSO	1.44207	1.28986	1.41378	1.43656	1.4335	1.19749	1.33176	1.29392	1.37136	1.33052	1.38136	1.21543	1.21009	1.3132	1.38529	1.22959

## Sheet: C504
	Crisis Scenario		n=504
	Model	Variable Selection Methods	None	NLP1	NLP2	NLP3	NLP4	NLP1, NLP2	NLP1, NLP3	NLP1, NLP4	NLP2, NLP3	NLP2, NLP4	NLP3, NLP4	NLP1, NLP2, NLP3	NLP1, NLP2, NLP4	NLP1, NLP3, NLP4	NLP2, NLP3, NLP4	NLP1, NLP2, NLP3, NLP4
	ANN	ElasticNet	0.505201	0.482784	0.517342	0.457374	0.465833	0.547742	0.484547	0.482383	0.547173	0.55133	0.50867	0.577249	0.552941	0.502053	0.553573	0.567943
		LASSO	0.546701	0.522132	0.548138	0.503018	0.525099	0.573791	0.528691	0.560517	0.573681	0.584311	0.526571	0.5925	0.585407	0.538934	0.565382	0.609472
		No Selection	0.752025	0.683184	0.789771	0.760371	0.753996	0.579223	0.540156	0.538652	0.582551	0.555645	0.540593	0.598098	0.589551	0.575125	0.592322	0.607819
		PCA	0.81438	0.739549	0.82545	0.821309	0.763681	0.626986	0.621088	0.605738	0.682366	0.674753	0.63585	0.670954	0.622757	0.646168	0.682011	0.66273
		PCA+ElasticNet	0.516457	0.488665	0.440235	0.45885	0.453557	0.531629	0.472916	0.488257	0.476235	0.524721	0.414164	0.520875	0.534743	0.489122	0.514381	0.537246
		PCA+LASSO	0.493004	0.495152	0.496397	0.467212	0.436548	0.510844	0.484177	0.510921	0.446397	0.481826	0.4461	0.547787	0.520593	0.498007	0.452037	0.543144
	ARIMAX	ElasticNet	0.364915	0.364664	0.365285	0.365246	0.36357	0.366077	0.365269	0.365241	0.365593	0.365169	0.365564	0.364284	0.365627	0.36546	0.365236	0.365745
		LASSO	0.372195	0.375311	0.374548	0.373053	0.373627	0.377918	0.375459	0.377951	0.375906	0.375241	0.376145	0.38007	0.379353	0.379175	0.378106	0.38172
		No Selection	0.37458	0.377797	0.37712	0.375215	0.374792	0.380956	0.378645	0.378862	0.378483	0.378592	0.37788	0.381879	0.382667	0.381488	0.381011	0.384569
		PCA	3.12385	2.87166	3.1415	3.1265	3.04928	2.87826	2.86656	2.86638	3.13875	3.14568	3.04383	2.8754	2.8729	2.86998	3.14863	2.87522
		PCA+ElasticNet	0.413303	0.414329	0.388022	0.389433	0.390144	0.388139	0.389535	0.390931	0.384412	0.385332	0.382867	0.384317	0.386087	0.383586	0.381434	0.381756
		PCA+LASSO	0.412502	0.411914	0.386922	0.388244	0.389425	0.387145	0.388456	0.390409	0.382997	0.384422	0.381768	0.383066	0.385247	0.382699	0.380218	0.380691
	GRU	ElasticNet	2.03781	1.34038	1.33227	1.43114	1.38368	1.37421	1.29958	1.37397	1.41865	1.31771	1.33971	1.3221	1.25485	1.3513	1.25318	1.21123
		LASSO	4.67174	3.49192	3.8556	3.09797	3.57939	3.34787	3.50778	3.02567	3.22746	3.28966	3.08037	3.13757	3.21153	3.21053	3.3877	3.31946
		No Selection	3.97726	3.31028	3.19647	3.67176	3.27578	3.40553	3.66358	3.48444	3.15592	3.38973	3.5285	3.16974	3.4879	3.47677	3.5398	3.60304
		PCA	2.3643	1.76095	2.4306	1.94902	1.93227	2.22268	1.76743	1.79822	2.42626	2.36665	2.00646	2.2033	2.32167	1.7723	2.45766	2.27501
		PCA+ElasticNet	1.00479	0.677237	0.666277	0.670483	0.669522	0.65512	0.639435	0.633729	0.623603	0.737146	0.588431	0.662725	0.733521	0.608872	0.645006	0.682389
		PCA+LASSO	0.934783	0.708953	0.660521	0.616238	0.655851	0.713796	0.655669	0.621043	0.653307	0.690751	0.594755	0.70189	0.687834	0.615815	0.679245	0.724521
	LSTM	ElasticNet	0.258533	0.315891	0.341486	0.254178	0.255184	0.399885	0.296068	0.29913	0.346542	0.341255	0.269428	0.405085	0.394422	0.30392	0.359783	0.404947
		LASSO	0.465691	0.525528	0.573852	0.482409	0.488278	0.63027	0.507182	0.544802	0.593818	0.595619	0.509404	0.614411	0.630217	0.552131	0.586885	0.631453
		No Selection	0.549895	0.552756	0.652111	0.573526	0.580046	0.687384	0.569958	0.628744	0.631991	0.607542	0.549846	0.647912	0.646573	0.571916	0.646269	0.662093
		PCA	0.519537	0.492062	0.562448	0.525145	0.524535	0.527938	0.485402	0.484904	0.57353	0.573262	0.528636	0.537669	0.527582	0.486916	0.57273	0.532467
		PCA+ElasticNet	0.255611	0.283751	0.29319	0.25352	0.256468	0.355535	0.275635	0.274324	0.290366	0.291785	0.257753	0.334465	0.345859	0.274956	0.302253	0.349348
		PCA+LASSO	0.248095	0.286079	0.294854	0.255474	0.249964	0.346694	0.273167	0.276187	0.297161	0.297212	0.255005	0.34918	0.339329	0.278107	0.299965	0.346204

## Sheet: C1008
	Crisis Scenario		n=1008
	Model	Variable Selection Methods	None	NLP1	NLP2	NLP3	NLP4	NLP1, NLP2	NLP1, NLP3	NLP1, NLP4	NLP2, NLP3	NLP2, NLP4	NLP3, NLP4	NLP1, NLP2, NLP3	NLP1, NLP2, NLP4	NLP1, NLP3, NLP4	NLP2, NLP3, NLP4	NLP1, NLP2, NLP3, NLP4
	ANN	ElasticNet	0.343845	0.328073	0.320181	0.317551	0.320258	0.376815	0.333182	0.334257	0.364764	0.357994	0.321799	0.391681	0.414164	0.349383	0.37136	0.401097
		LASSO	0.398125	0.342945	0.398628	0.352697	0.311186	0.440823	0.366849	0.393883	0.337657	0.373771	0.340522	0.421901	0.43663	0.383939	0.432731	0.436957
		No Selection	0.558975	0.558863	0.559351	0.583979	0.563723	0.409272	0.393854	0.359825	0.371954	0.397446	0.34915	0.43057	0.436177	0.351617	0.409385	0.422613
		PCA	0.616421	0.59832	0.621758	0.615116	0.636362	0.495152	0.483	0.49989	0.574948	0.567012	0.549223	0.540549	0.505654	0.520114	0.534901	0.509866
		PCA+ElasticNet	0.341293	0.3313	0.319613	0.306436	0.284347	0.371945	0.354983	0.313248	0.305702	0.309967	0.310315	0.403587	0.383788	0.353275	0.298496	0.390462
		PCA+LASSO	0.3749	0.319412	0.316874	0.336637	0.314785	0.333591	0.330156	0.326795	0.317637	0.332223	0.291287	0.356663	0.382822	0.375515	0.353341	0.401899
	ARIMAX	ElasticNet	0.170434	0.172766	0.17083	0.170793	0.171536	0.172619	0.172872	0.17284	0.172097	0.170731	0.171991	0.173684	0.174603	0.17495	0.173593	0.175188
		LASSO	0.201407	0.215644	0.205675	0.201853	0.201939	0.219956	0.216688	0.21668	0.208315	0.208486	0.203579	0.224554	0.224083	0.218479	0.21037	0.226368
		No Selection	0.201969	0.216442	0.206211	0.202429	0.202552	0.220761	0.21745	0.21745	0.208979	0.208983	0.204214	0.225308	0.224974	0.219314	0.21104	0.227109
		PCA	2.03914	2.01154	2.10156	2.03985	2.09535	2.01716	2.00514	2.01215	2.10536	2.05074	2.09335	2.01488	2.02023	2.01083	2.10698	2.02237
		PCA+ElasticNet	0.222802	0.224328	0.198462	0.191888	0.19215	0.19971	0.192536	0.192732	0.189372	0.189931	0.185545	0.190592	0.190879	0.186164	0.185445	0.186267
		PCA+LASSO	0.222362	0.223899	0.195264	0.1907	0.191125	0.198733	0.191334	0.191739	0.188207	0.188929	0.184318	0.189444	0.189836	0.18499	0.184333	0.185069
	GRU	ElasticNet	0.678958	0.524236	0.59123	0.607494	0.436163	0.593128	0.563166	0.564774	0.488089	0.563482	0.512858	0.679015	0.579508	0.56498	0.576577	0.598342
		LASSO	2.03324	1.54482	1.6759	1.66944	1.61607	1.51136	1.57765	1.53661	1.44953	1.7285	1.83495	1.5474	1.50448	1.62775	1.59129	1.68242
		No Selection	2.59757	1.53315	1.47505	1.5686	1.42019	1.53757	1.56497	1.56178	1.41736	1.48637	1.69196	1.63788	1.58379	1.72897	1.51507	1.37392
		PCA	1.40883	0.961315	1.37039	1.04683	1.06722	1.29653	1.01586	1.00892	1.23217	1.41235	1.14795	1.30501	1.38258	1.03084	1.29937	1.17979
		PCA+ElasticNet	0.378362	0.295985	0.299548	0.252866	0.284101	0.329327	0.29238	0.308481	0.297649	0.316777	0.27823	0.35488	0.359701	0.295836	0.312363	0.3533
		PCA+LASSO	0.376349	0.305251	0.301404	0.270236	0.303282	0.358666	0.299355	0.296833	0.325086	0.322091	0.299935	0.342341	0.335755	0.313784	0.325103	0.366268
	LSTM	ElasticNet	0.159013	0.178867	0.19062	0.160894	0.163934	0.234671	0.183637	0.184309	0.20103	0.196994	0.166242	0.240426	0.250738	0.191833	0.203237	0.258354
		LASSO	0.356022	0.368294	0.375286	0.362321	0.366313	0.428752	0.374922	0.375308	0.399997	0.361842	0.36865	0.438196	0.44996	0.383562	0.400224	0.446319
		No Selection	0.355913	0.386084	0.397476	0.377959	0.376227	0.442962	0.390572	0.382046	0.411193	0.409756	0.382922	0.440684	0.479376	0.392291	0.405623	0.454969
		PCA	0.444631	0.412042	0.499151	0.449437	0.44696	0.448549	0.406728	0.405911	0.506336	0.499234	0.451734	0.447335	0.473596	0.404317	0.504125	0.483882
		PCA+ElasticNet	0.172676	0.194683	0.208378	0.176578	0.179329	0.243832	0.196168	0.201373	0.205396	0.202547	0.180491	0.24933	0.248444	0.198687	0.208316	0.248257
		PCA+LASSO	0.179423	0.195479	0.202314	0.177586	0.175832	0.243342	0.198269	0.194083	0.212888	0.207503	0.179104	0.244696	0.253141	0.199788	0.2095	0.247766
