# Supplementary material for: A Unified Framework for Stock Price Prediction: Integrating NLP-Based Sentiment, Dimensionality Reduction and Regularization
Source: Research Square preprint supplement (doi:10.21203/rs.3.rs-8194360/v1), 2025-12-03
Supplement: Supplementary file 2 [file d70179ddbc4790e033813708.xlsx]

## Sheet: Sheet1
	Ticker	Variable Selection	NLP Variables	Model	RMSE	R^2
	AAPL	ElasticNet	Sentiment Score, VADER Compound, Lexicon Score	LSTM	1.2318	0.8035
		ElasticNet	Sentiment Polarity, Sentiment Score, VADER Compound	GRU	1.24468	0.799369
		ElasticNet	Sentiment Polarity, Sentiment Score	GRU	1.24677	0.798696
	AMZN	PCA+LASSO	Lexicon Score	ARIMAX	1.20832	0.897131
		PCA	Lexicon Score	ARIMAX	1.20832	0.897131
		PCA+LASSO	Sentiment Polarity	ARIMAX	1.20854	0.897094
	GOOG	PCA+ElasticNet	VADER Compound	GRU	1.01886	0.8822
		PCA+LASSO	None	GRU	1.03061	0.879467
		PCA+ElasticNet	Lexicon Score	LSTM	1.03311	0.878881
	META	PCA	Lexicon Score	LSTM	3.71178	0.835859
		PCA+ElasticNet	Sentiment Polarity, Sentiment Score, VADER Compound, Lexicon Score	ANN	3.74282	0.833103
		PCA+ElasticNet	Sentiment Polarity, VADER Compound, Lexicon Score	ANN	3.7431	0.833078
	MSFT	PCA+ElasticNet	VADER Compound	LSTM	2.03509	0.857344
		PCA+LASSO	VADER Compound, Lexicon Score	GRU	2.0395	0.856725
		PCA+ElasticNet	Sentiment Score, VADER Compound, Lexicon Score	LSTM	2.03976	0.856688
	NFLX	PCA+ElasticNet	Sentiment Score, VADER Compound, Lexicon Score	LSTM	4.43953	0.884868
		PCA+ElasticNet	Sentiment Score, VADER Compound, Lexicon Score	GRU	4.50547	0.881422
		PCA+LASSO	Sentiment Polarity, Sentiment Score, VADER Compound, Lexicon Score	LSTM	4.51184	0.881087
	NVDA	PCA+ElasticNet	Sentiment Score, VADER Compound	GRU	1.50428	0.84921
		PCA+ElasticNet	Sentiment Polarity, VADER Compound	GRU	1.52779	0.844459
		PCA+ElasticNet	Sentiment Score	GRU	1.53173	0.843657
	TSLA	PCA+LASSO	Sentiment Polarity, Sentiment Score	ANN	4.302	0.87831
		PCA+LASSO	Sentiment Score	LSTM	4.33566	0.876399
		PCA+LASSO	Lexicon Score	ANN	4.33834	0.876246
